# Supplementary material for: A Rab escort protein regulates the MAPK pathway that controls filamentous growth in yeast
Source: PubMed Central journal article supplement (PMC7746766; doi:10.1038/s41598-020-78470-4), 2020-12-17

# Supplementary Materials

## **A Rab Escort Protein Regulates the MAPK Pathway That Controls Filamentous Growth in Yeast**

Sheida Jamalzadeh <sup>1</sup>, Atindra N. Pujari <sup>2</sup>, Paul J. Cullen <sup>2</sup> †

*1. Department of Chemical and Biological Engineering, University at Buffalo, State University of New York, Buffalo New York*

*2. Department of Biological Sciences, University at Buffalo, State University of New York, Buffalo New York*

† Corresponding author:

Address:

Paul J. Cullen  
Department of Biological Sciences  
532 Cooke Hall  
State University of New York at Buffalo  
Buffalo, NY 14260-1300  
Phone: (716)-645-4923  
FAX: (716)-645-2975  
E-mail: [pjcullen@buffalo.edu](mailto:pjcullen@buffalo.edu)

**Figure S1. Growth of the indicated strains on S-GAL-URA and S-GAL-URA-HIS media. Serial dilutions were spotted.**

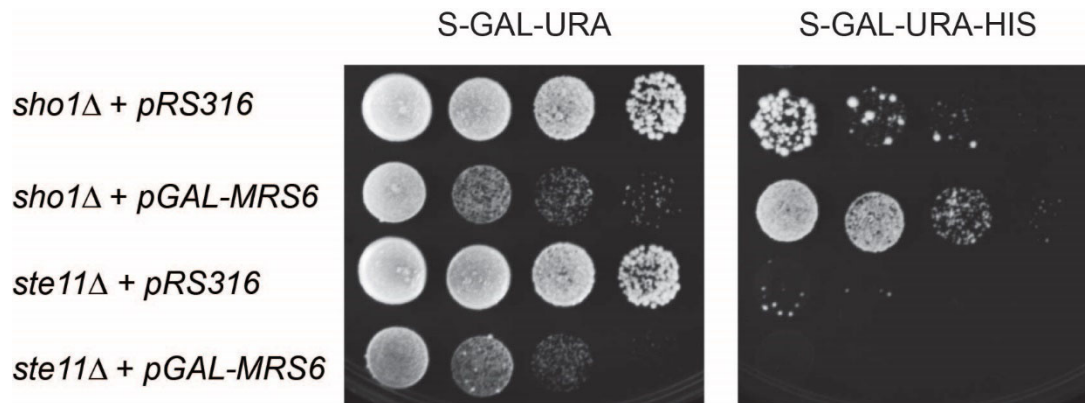

**Figure S2. Growth of the indicated strains on S-D-URA, S-GAL-URA and S-GAL-URA+1M KCl media.**

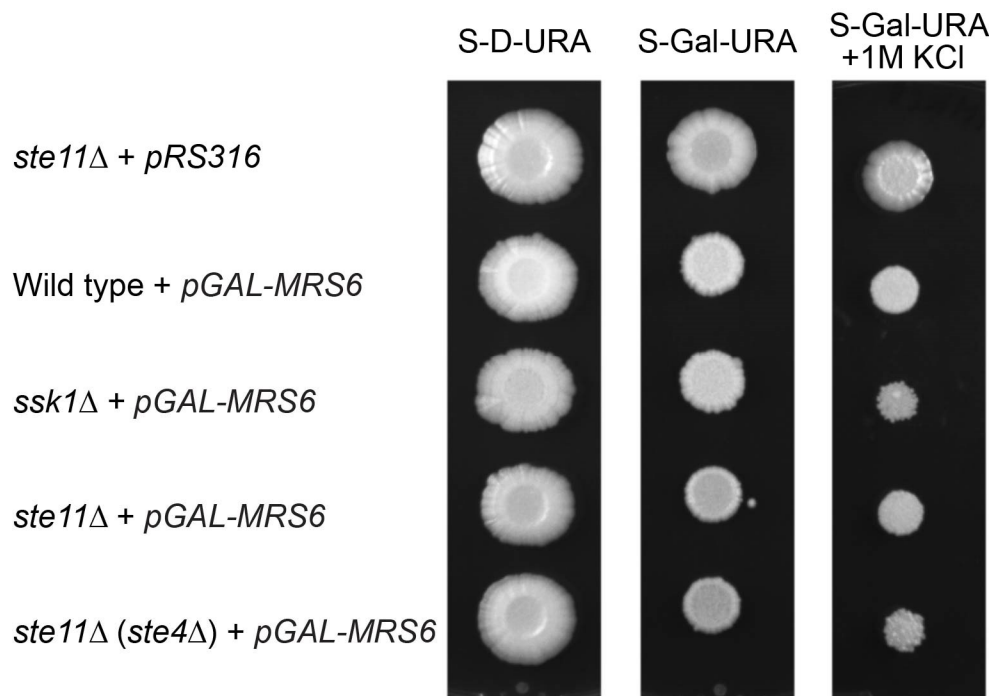



Figure S3A. Raw material for Fig. 6A.

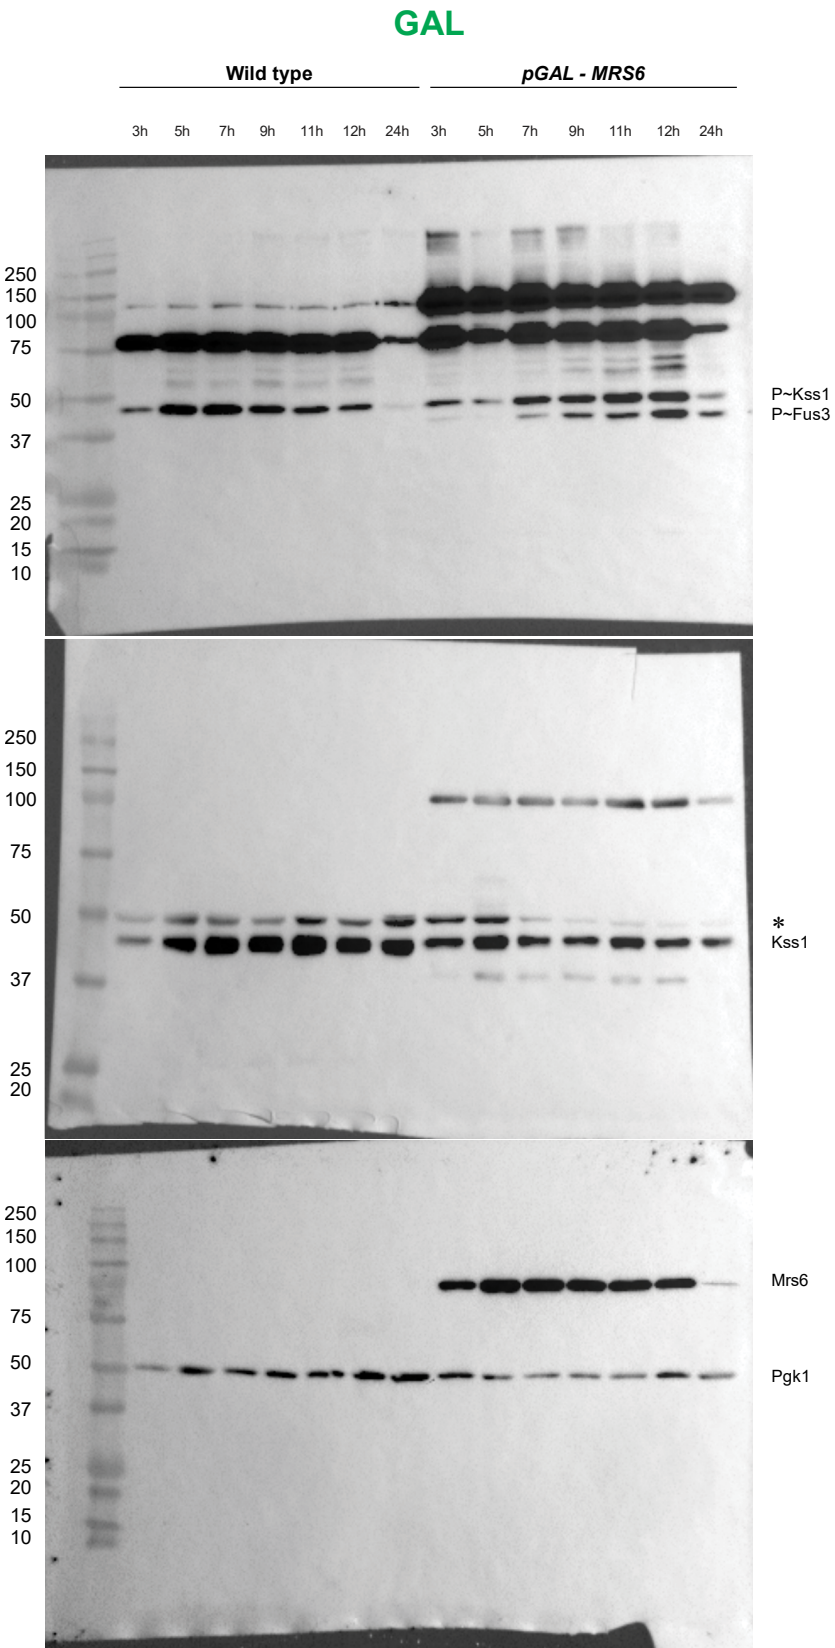

Figure S3B. Raw material for Fig. 6C.

1.0 M KCl

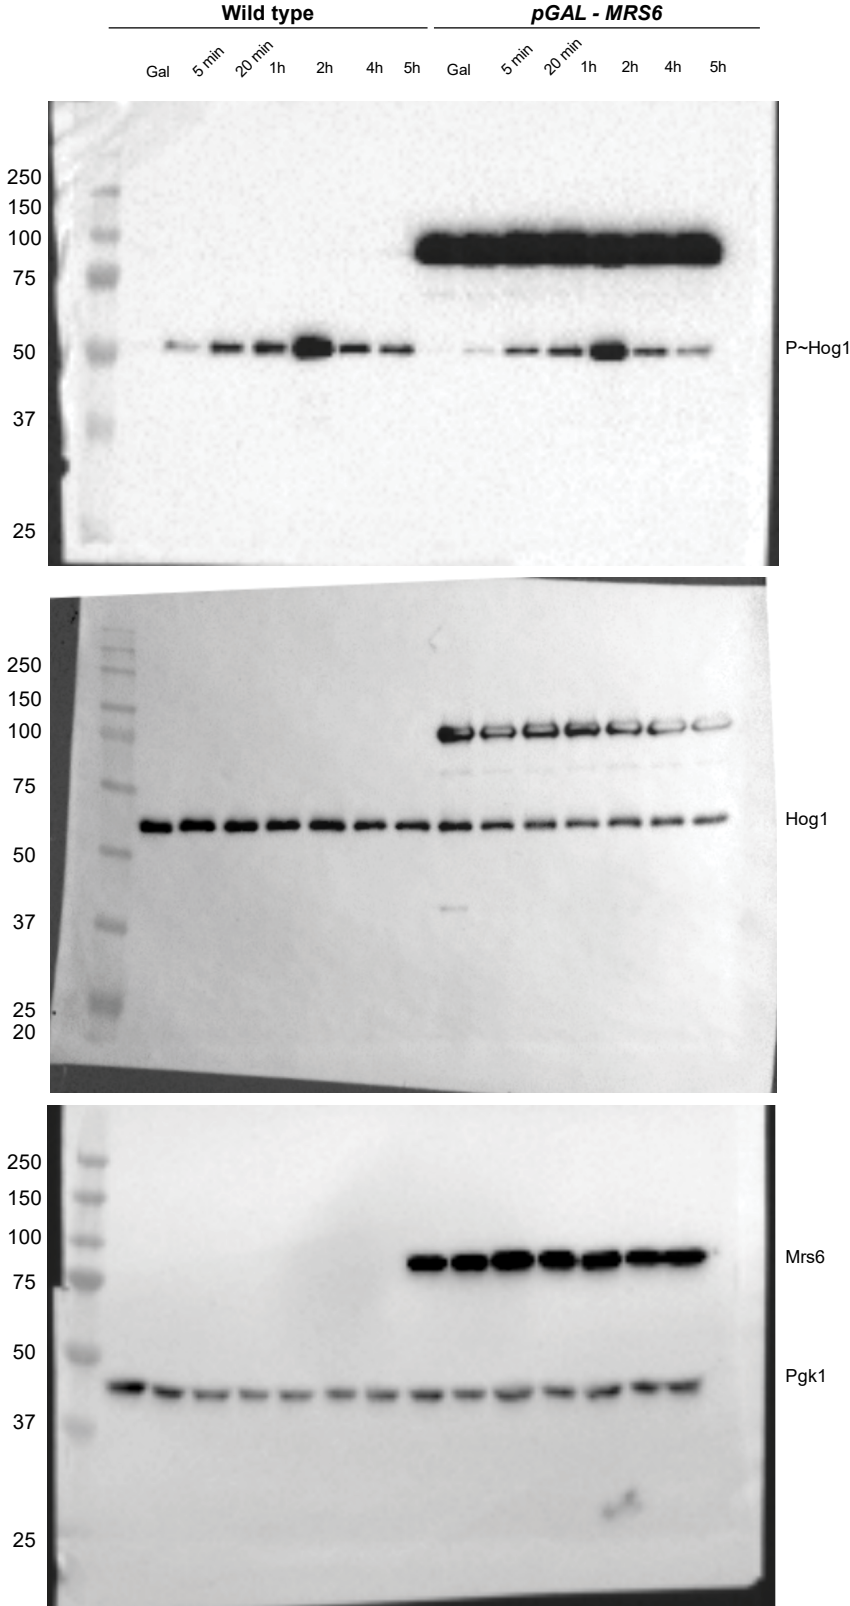

Figure S3C. Raw material for Fig. 6E.

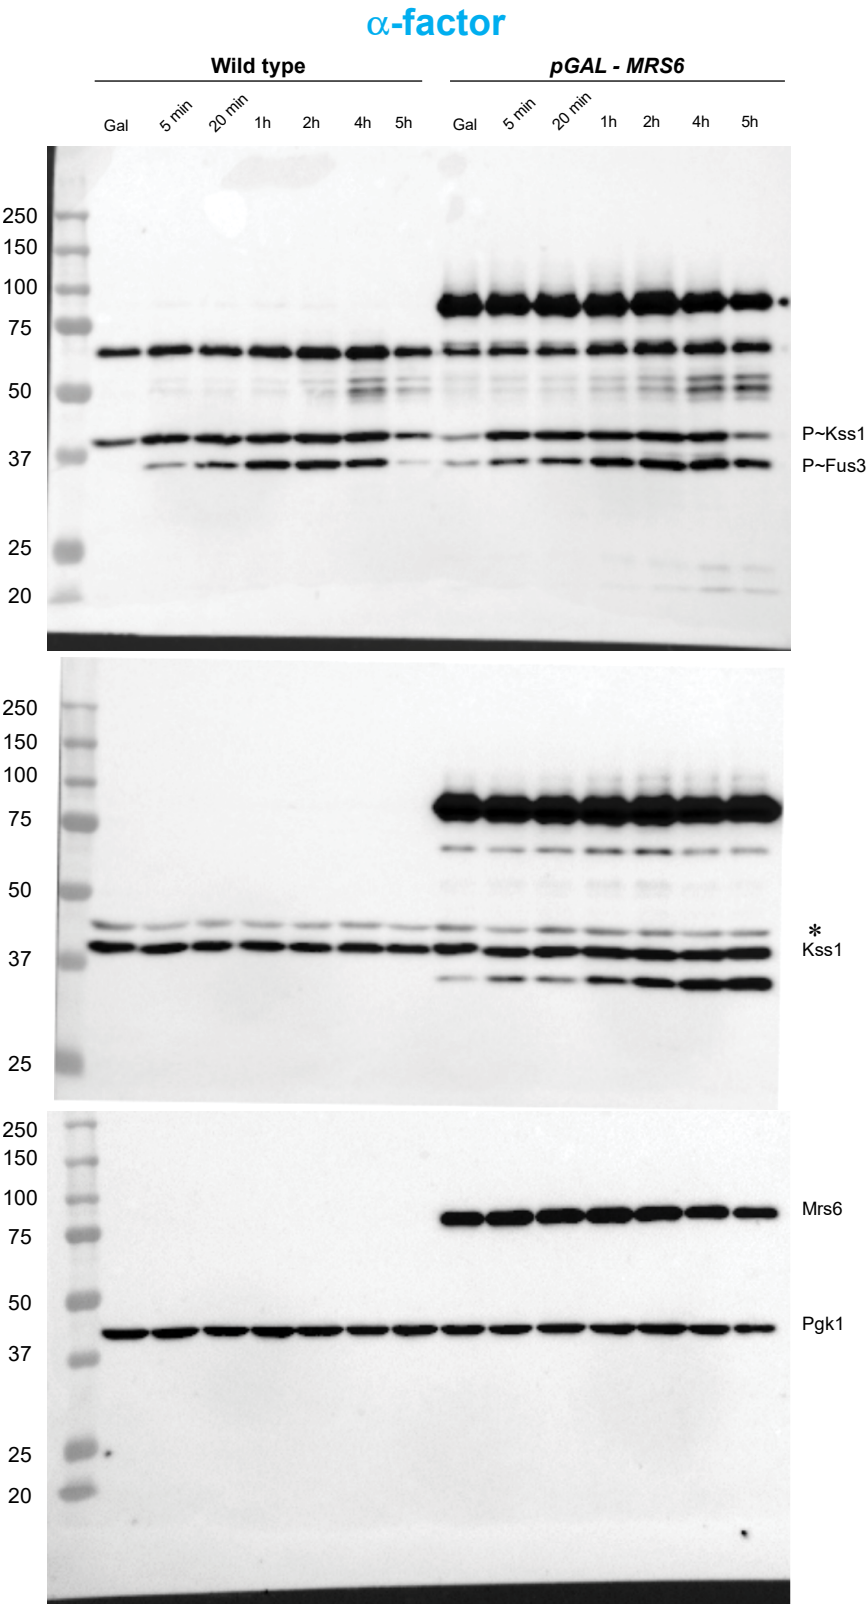

**Table S1. Yeast strains used in the study.**

| Strain <sup>[a]</sup> | Genotype                                                                                                                                   | Reference                      |
|-----------------------|--------------------------------------------------------------------------------------------------------------------------------------------|--------------------------------|
| P1694A <sup>[b]</sup> | <i>MATa trp1-901 leu2-3,112 ura3-52 his3-200 gal4A gal80A LYS2::GALI-HIS3 GAL2-ADE2 met2::GAL7-lacZ</i>                                    | (James et al., 1996)           |
| PC313                 | <i>MATa ura3-52</i>                                                                                                                        | (Liu et al., 1993)             |
| PC538                 | <i>MATa ste4 FUS1-lacZ FUS1-HIS3 ura3-52</i>                                                                                               | (Cullen et al., 2004)          |
| PC549                 | <i>MATa SY3089 ste4 FUS1-lacZ FUS1-HIS3 ura3-52 ste20::URA3</i>                                                                            | (Cullen and Sprague, 2000)     |
| PC610                 | <i>MATa SY3089 ste4 FUS1-lacZ FUS1-HIS3 ura3-52 ste50::URA3</i>                                                                            | (Pitoniak et al., 2015)        |
| PC999                 | <i>MATa ste4 FUS1-lacZ FUS1-HIS3 ura3-52 MSB2HA@500 aa</i>                                                                                 | (Cullen et al., 2004)          |
| PC3209                | <i>MATa ste4 FUS1-lacZ FUS1-HIS3 ura3-52 msb2::KanMX6</i>                                                                                  | (Cullen et al., 2004)          |
| PC3551                | <i>MATa ste4 FUS1-lacZ FUS1-HIS3 ura3-52 leu2::HYG bem4::NAT</i>                                                                           | (Pitoniak et al., 2015)        |
| PC3861                | <i>MATa ste11::NAT ste4 FUS1-lacZ FUS1-HIS3 ura3-52</i>                                                                                    | (Karunanithi et al., 2010)     |
| PC5024                | <i>MATa ste11::NAT ura3-52</i>                                                                                                             | (Pitoniak et al., 2015)        |
| PC5392                | <i>MATa ste4 FUS1-lacZ FUS1-HIS3 ura3-52 STE7-GFP::KanMX6</i>                                                                              | This study                     |
| PC5692                | <i>MATa ste4 FUS1-lacZ FUS1-HIS3 ura3-52 sho1::HYG</i>                                                                                     | (Vadaie et al., 2008)          |
| PC6604                | <i>MATa ura3-52 leu2 ssk1 ste11::NAT</i>                                                                                                   | (Basu et al., 2020)            |
| PC6785                | <i>MATa ura3-52 leu2 ssk1 ste20::URA3</i>                                                                                                  | (Basu et al., 2020)            |
| PC6810                | <i>MATa ura3-52 leu2 ssk1 ura3-</i>                                                                                                        | (Basu et al., 2020)            |
| PC7352                | <i>MATa ste4 FUS1-lacZ FUS1-HIS3 ura3-52 opy2::URA3</i>                                                                                    | (Karunanithi and Cullen, 2012) |
| PC7386                | <i>MATa trp1-901 leu2-3,112 ura3-52 his3-200 gal4A gal80A LYS2::GALI-HIS3 GAL2-ADE2 met2::GAL7-lacZ pGAD-C1 and pGBDU-C1<sup>[c]</sup></i> | This study                     |
| PC7387                | <i>MATa trp1-901 leu2-3,112 ura3-52 his3-200 gal4A gal80A LYS2::GALI-HIS3 GAL2-ADE2 met2::GAL7-lacZ pGAD-C1 and pGBDU-C1-MRS6</i>          | This study                     |
| PC7388                | <i>MATa trp1-901 leu2-3,112 ura3-52 his3-200 gal4A gal80A LYS2::GALI-HIS3 GAL2-ADE2 met2::GAL7-lacZ pGAD-C1 and pGBDU-C1-BEM4</i>          | This study                     |
| PC7389                | <i>MATa trp1-901 leu2-3,112 ura3-52 his3-200 gal4A gal80A LYS2::GALI-HIS3 GAL2-ADE2 met2::GAL7-lacZ pGAD-C1-CDC42 and pGBDU-C1</i>         | This study                     |
| PC7390                | <i>MATa trp1-901 leu2-3,112 ura3-52 his3-200 gal4A gal80A LYS2::GALI-HIS3 GAL2-ADE2 met2::GAL7-lacZ pGAD-C1-CDC42 and pGBDU-C1-MRS6</i>    | This study                     |
| PC7391                | <i>MATa trp1-901 leu2-3,112 ura3-52 his3-200 gal4A gal80A LYS2::GALI-HIS3 GAL2-ADE2 met2::GAL7-lacZ pGAD-C1-CDC42 and pGBDU-C1-BEM4</i>    | This study                     |
| PC7393                | <i>MATa trp1-901 leu2-3,112 ura3-52 his3-200 gal4A gal80A LYS2::GALI-HIS3 GAL2-ADE2 met2::GAL7-lacZ pGBDU-C1-CDC42 and pGAD-C1</i>         | This study                     |
| PC7394                | <i>MATa trp1-901 leu2-3,112 ura3-52 his3-200 gal4A gal80A LYS2::GALI-HIS3 GAL2-ADE2 met2::GAL7-lacZ pGBDU-C1-CDC42 and pGAD-C1-MRS6</i>    | This study                     |
| PC7395                | <i>MATa trp1-901 leu2-3,112 ura3-52 his3-200 gal4A gal80A LYS2::GALI-HIS3 GAL2-ADE2 met2::GAL7-lacZ pGAD-C1-MRS6 and pGBDU-C1-STE11</i>    | This study                     |
| PC7396                | <i>MATa trp1-901 leu2-3,112 ura3-52 his3-200 gal4A gal80A LYS2::GALI-HIS3 GAL2-ADE2 met2::GAL7-lacZ pGAD-C1 and pGBDU-C1-STE11</i>         | This study                     |
| PC7397                | <i>MATa trp1-901 leu2-3,112 ura3-52 his3-200 gal4A gal80A LYS2::GALI-HIS3 GAL2-ADE2 met2::GAL7-lacZ pGAD-C1-MRS6 and pGBDU-C1-STE20</i>    | This study                     |
| PC7398                | <i>MATa trp1-901 leu2-3,112 ura3-52 his3-200 gal4A gal80A LYS2::GALI-HIS3 GAL2-ADE2 met2::GAL7-lacZ pGAD-C1 and pGBDU-C1-STE20</i>         | This study                     |
| PC7399                | <i>MATa trp1-901 leu2-3,112 ura3-52 his3-200 gal4A gal80A LYS2::GALI-HIS3 GAL2-ADE2 met2::GAL7-lacZ pGAD-C1-MRS6 and pGBDU-C1-STE50</i>    | This study                     |
| PC7400                | <i>MATa trp1-901 leu2-3,112 ura3-52 his3-200 gal4A gal80A LYS2::GALI-HIS3 GAL2-ADE2 met2::GAL7-lacZ pGAD-C1 and pGBDU-C1-STE50</i>         | This study                     |
| PC7401                | <i>MATa trp1-901 leu2-3,112 ura3-52 his3-200 gal4A gal80A LYS2::GALI-HIS3 GAL2-ADE2 met2::GAL7-lacZ pGAD-C1-MRS6 and pGBDU-C1-RD11</i>     | This study                     |
| PC7402                | <i>MATa trp1-901 leu2-3,112 ura3-52 his3-200 gal4A gal80A LYS2::GALI-HIS3 GAL2-ADE2 met2::GAL7-lacZ pGAD-C1 and pGBDU-C1-RD11</i>          | This study                     |
| PC7403                | <i>MATa trp1-901 leu2-3,112 ura3-52 his3-200 gal4A gal80A LYS2::GALI-HIS3 GAL2-ADE2 met2::GAL7-lacZ pGAD-C1-MRS6 and pGBDU-C1-STE4</i>     | This study                     |
| PC7404                | <i>MATa trp1-901 leu2-3,112 ura3-52 his3-200 gal4A gal80A LYS2::GALI-HIS3 GAL2-ADE2 met2::GAL7-lacZ pGAD-C1 and pGBDU-C1-STE4</i>          | This study                     |
| PC7405                | <i>MATa trp1-901 leu2-3,112 ura3-52 his3-200 gal4A gal80A LYS2::GALI-HIS3 GAL2-ADE2 met2::GAL7-lacZ pGAD-C1-MRS6 and pGBDU-C1-STE7</i>     | This study                     |
| PC7406                | <i>MATa trp1-901 leu2-3,112 ura3-52 his3-200 gal4A gal80A LYS2::GALI-HIS3 GAL2-ADE2 met2::GAL7-lacZ pGAD-C1 and pGBDU-C1-STE7</i>          | This study                     |
| PC7407                | <i>MATa trp1-901 leu2-3,112 ura3-52 his3-200 gal4A gal80A LYS2::GALI-HIS3 GAL2-ADE2 met2::GAL7-lacZ pGAD-C1-MRS6 and pGBDU-C1-STE11</i>    | This study                     |
| PC7408                | <i>MATa trp1-901 leu2-3,112 ura3-52 his3-200 gal4A gal80A LYS2::GALI-HIS3 GAL2-ADE2 met2::GAL7-lacZ pGAD-C1 and pGBDU-C1-STE11</i>         | This study                     |
| PC7409                | <i>MATa trp1-901 leu2-3,112 ura3-52 his3-200 gal4A gal80A LYS2::GALI-HIS3 GAL2-ADE2 met2::GAL7-lacZ pGAD-C1-MRS6 and pGBDU-C1-STE20</i>    | This study                     |
| PC7410                | <i>MATa trp1-901 leu2-3,112 ura3-52 his3-200 gal4A gal80A LYS2::GALI-HIS3 GAL2-ADE2 met2::GAL7-lacZ pGAD-C1 and pGBDU-C1-STE20</i>         | This study                     |
| PC7411                | <i>MATa trp1-901 leu2-3,112 ura3-52 his3-200 gal4A gal80A LYS2::GALI-HIS3 GAL2-ADE2 met2::GAL7-lacZ pGAD-C1 and pGBDU-C1-CDC24</i>         | This study                     |
| PC7417                | <i>MATa trp1-901 leu2-3,112 ura3-52 his3-200 gal4A gal80A LYS2::GALI-HIS3 GAL2-ADE2 met2::GAL7-lacZ pGAD-C1-MRS6 and pGBDU-C1-OPY2</i>     | This study                     |
| PC7418                | <i>MATa trp1-901 leu2-3,112 ura3-52 his3-200 gal4A gal80A LYS2::GALI-HIS3 GAL2-ADE2 met2::GAL7-lacZ pGAD-C1 and pGBDU-C1-OPY2</i>          | This study                     |
| PC7419                | <i>MATa trp1-901 leu2-3,112 ura3-52 his3-200 gal4A gal80A LYS2::GALI-HIS3 GAL2-ADE2 met2::GAL7-lacZ pGAD-C1-MRS6 and pGBDU-C1-SSK1</i>     | This study                     |
| PC7420                | <i>MATa trp1-901 leu2-3,112 ura3-52 his3-200 gal4A gal80A LYS2::GALI-HIS3 GAL2-ADE2 met2::GAL7-lacZ pGAD-C1 and pGBDU-C1-SSK1</i>          | This study                     |
| PC7421                | <i>MATa trp1-901 leu2-3,112 ura3-52 his3-200 gal4A gal80A LYS2::GALI-HIS3 GAL2-ADE2 met2::GAL7-lacZ pGAD-C1-MRS6 and pGBDU-C1-KSS1</i>     | This study                     |
| PC7422                | <i>MATa trp1-901 leu2-3,112 ura3-52 his3-200 gal4A gal80A LYS2::GALI-HIS3 GAL2-ADE2 met2::GAL7-lacZ pGAD-C1 and pGBDU-C1-KSS1</i>          | This study                     |
| PC7425                | <i>MATa trp1-901 leu2-3,112 ura3-52 his3-200 gal4A gal80A LYS2::GALI-HIS3 GAL2-ADE2 met2::GAL7-lacZ pGAD-C1-MRS6 and pGBDU-C1-BEM1</i>     | This study                     |
| PC7426                | <i>MATa trp1-901 leu2-3,112 ura3-52 his3-200 gal4A gal80A LYS2::GALI-HIS3 GAL2-ADE2 met2::GAL7-lacZ pGAD-C1 and pGBDU-C1-BEM1</i>          | This study                     |
| PC7427                | <i>MATa trp1-901 leu2-3,112 ura3-52 his3-200 gal4A gal80A LYS2::GALI-HIS3 GAL2-ADE2 met2::GAL7-lacZ pGAD-C1-MRS6 and pGBDU-C1-BEM4</i>     | This study                     |
| PC7428                | <i>MATa trp1-901 leu2-3,112 ura3-52 his3-200 gal4A gal80A LYS2::GALI-HIS3 GAL2-ADE2 met2::GAL7-lacZ pGAD-C1 and pGBDU-C1-BEM4</i>          | This study                     |
| PC7429                | <i>MATa trp1-901 leu2-3,112 ura3-52 his3-200 gal4A gal80A LYS2::GALI-HIS3 GAL2-ADE2 met2::GAL7-lacZ pGAD-C1-MRS6 and pGBDU-C1-IRE1</i>     | This study                     |
| PC7430                | <i>MATa trp1-901 leu2-3,112 ura3-52 his3-200 gal4A gal80A LYS2::GALI-HIS3 GAL2-ADE2 met2::GAL7-lacZ pGAD-C1 and pGBDU-C1-IRE1</i>          | This study                     |
| PC7431                | <i>MATa trp1-901 leu2-3,112 ura3-52 his3-200 gal4A gal80A LYS2::GALI-HIS3 GAL2-ADE2 met2::GAL7-lacZ pGAD-C1-MRS6</i>                       | This study                     |
| PC7439                | <i>MATa ste4 FUS1-lacZ FUS1-HIS3 ura3-52 pRS316<sup>[d]</sup></i>                                                                          | This study                     |
| PC7440                | <i>MATa ste4 FUS1-lacZ FUS1-HIS3 ura3-52 pGAL-BMH1<sup>[e]</sup></i>                                                                       | This study                     |
| PC7441                | <i>MATa ste4 FUS1-lacZ FUS1-HIS3 ura3-52 pGAL-BMH2<sup>[e]</sup></i>                                                                       | This study                     |
| PC7442                | <i>MATa ste4 FUS1-lacZ FUS1-HIS3 ura3-52 pGAL-MRS6<sup>[e]</sup></i>                                                                       | This study                     |
| PC7443                | <i>MATa ste4 FUS1-lacZ FUS1-HIS3 ura3-52 pGAL-KAR2<sup>[e]</sup></i>                                                                       | This study                     |
| PC7444                | <i>MATa ura3-52 leu2 ssk1 pRS316<sup>[d]</sup></i>                                                                                         | This study                     |
| PC7445                | <i>MATa ura3-52 leu2 ssk1 pGAL-BMH1<sup>[e]</sup></i>                                                                                      | This study                     |
| PC7446                | <i>MATa ura3-52 leu2 ssk1 pGAL-BMH2<sup>[e]</sup></i>                                                                                      | This study                     |
| PC7447                | <i>MATa ura3-52 leu2 ssk1 pGAL-MRS6<sup>[e]</sup></i>                                                                                      | This study                     |
| PC7448                | <i>MATa ura3-52 leu2 ssk1 pGAL-KAR2<sup>[e]</sup></i>                                                                                      | This study                     |
| PC7589                | <i>MATa ura3-52 CDC3-mCherry::HYG + GFP-CDC42 + pRS316</i>                                                                                 | This study                     |
| PC7590                | <i>MATa ura3-52 CDC3-mCherry::HYG + GFP-CDC42 + pGAL-MRS6</i>                                                                              | This study                     |
| PC7592                | <i>MATa ura3-52 CDC3-mCherry::HYG tec1::NAT + GFP-Cdc42 + pGAL-MRS6</i>                                                                    | This study                     |

<sup>[a]</sup> Strains are in the  $\Sigma$ 1287b background unless otherwise indicated.

<sup>[b]</sup> This strain comes from the laboratory of M. Johnston (University of Colorado Medical Center in Denver).

<sup>[c]</sup> pGAD-C1 and pGBDU-C1 and plasmids have been described (James et al. 1996).

<sup>[d]</sup> pRS vectors are from (Sikorski and Hieter1989).

<sup>[e]</sup> pGAL plasmids are from (Gelperin et al. 2005).

Table S2 <sup>[a]</sup>. Analysis of the genome-wide overexpression screen.

| Plate <sup>[a]</sup> | Row | Column | Gene ID   | Gene Name <sup>[b]</sup> | Intensity <sup>[c]</sup> |
|----------------------|-----|--------|-----------|--------------------------|--------------------------|
| 20                   | A   | 5      | YOR202W   | HIS3                     | 245                      |
| 38                   | D   | 1      | YJL077C   | ICS3                     | 226                      |
| 42                   | B   | 2      | YHR213W-A | YHR213W-A                | 186                      |
| 30                   | F   | 7      | YOR370C   | MRS6                     | 174                      |
| 23                   | A   | 5      | YER177W   | BMH1                     | 165                      |
| 52                   | B   | 4      | YGR044C   | RME1                     | 158                      |
| 28                   | B   | 5      | YML116W   | ATR1                     | 155                      |
| 52                   | A   | 1      | YOR251C   | TUM1                     | 154                      |
| 52                   | D   | 1      | YPR151C   | SUE1                     | 153                      |
| 52                   | B   | 2      | YDL095W   | PMT1                     | 151                      |
| 52                   | A   | 5      | YDR418W   | RPL12B                   | 150                      |
| 28                   | C   | 10     | YOR028C   | CIN5                     | 147                      |
| 52                   | C   | 1      | YHR215W   | PHO12                    | 139                      |
| 52                   | B   | 3      | YDR529C   | QCR7                     | 137                      |
| 52                   | B   | 1      | YAR071W   | PHO11                    | 136                      |
| 32                   | C   | 5      | YOR212W   | STE4                     | 134                      |
| 52                   | A   | 3      | YLL010C   | PSR1                     | 134                      |
| 52                   | A   | 7      | YPL080C   | YPL080C                  | 131                      |
| 36                   | A   | 9      | YDR099W   | BMH2                     | 131                      |
| 41                   | D   | 3      | YDR152W   | GIR2                     | 128                      |
| 19                   | B   | 4      | YGL121C   | GPG1                     | 122                      |
| 42                   | F   | 2      | YIL028W   | RPL13A                   | 118                      |
| 52                   | D   | 5      | YGL030W   | YIL028W                  | 116                      |
| 56                   | E   | 8      | YDL082W   | RPL30                    | 115                      |
| 42                   | A   | 1      | YHL002W   | HSE1                     | 115                      |
| 52                   | C   | 2      | YLR209C   | PNP1                     | 115                      |
| 51                   | G   | 4      | YDL159W   | STE7                     | 110                      |
| 27                   | H   | 10     | YOR336W   | KRE5                     | 109                      |
| 52                   | A   | 6      | YDL191W   | RPL35A                   | 106                      |
| 38                   | E   | 4      | YOL085C   | YOL085C                  | 104                      |
| 21                   | C   | 10     | YGL209W   | MIG2                     | 102                      |
| 24                   | A   | 6      | YAL027W   | SAW1                     | 102                      |
| 37                   | B   | 1      | YBR021W   | FUR4                     | 101                      |
| 27                   | B   | 11     | YDR303C   | RSC3                     | 100                      |
| 32                   | B   | 7      | YKL028W   | TFA1                     | 97                       |
| 42                   | A   | 3      | YIL060W   | YIL060W                  | 96                       |
| -                    | -   | -      | -         | N.D.                     | 94                       |
| -                    | -   | -      | -         | N.D.                     | 92                       |
| 37                   | E   | 2      | YBL014C   | RRN6                     | 85                       |
| 52                   | F   | 3      | YDL138W   | RGT2                     | 81                       |
| 38                   | A   | 3      | YJL034W   | KAR2                     | 80                       |
| 4                    | F   | 1      | YDR510C-A | YDR510C-A                | 73                       |
| 44                   | E   | 11     | YDR519W   | FPR2                     | 68                       |
| 27                   | F   | 12     | YPR070W   | MED1                     | 68                       |
| 31                   | C   | 8      | YDR182W   | CDC1                     | 67                       |
| 4                    | D   | 3      | YHR125W   | YHR125W                  | 67                       |
| 61                   | A   | 7      | YOR216C   | RUD3                     | 64                       |
| 23                   | H   | 8      | YMR251W-A | HOR7                     | 62                       |
| 46                   | B   | 1      | YML118W   | NGL3                     | 62                       |

**Footnotes**

<sup>[a]</sup>The data file comes from (Gelperin et al., 2005). Blank lines in the data file indicate wells for which the clone identity could not be determined after two rounds of sequencing.

<sup>[b]</sup>Gene names for the top 200 candidates are shown.

<sup>[c]</sup>Spot intensity was measured by ImageJ analysis.

Table S3. Validation of candidates from the screen by plasmid transformation into wild-type cells and the *msb2Δ* mutant.

| Screen Validation in WT <sup>[a]</sup> |                          | Normalized Growth Intensity in WT <sup>[c]</sup> | Growth Intensity in WT Normalized to <i>msb2Δ</i> <sup>[d]</sup> |
|----------------------------------------|--------------------------|--------------------------------------------------|------------------------------------------------------------------|
| Gene                                   | Intensity <sup>[b]</sup> |                                                  |                                                                  |
| <i>HIS3</i>                            | 204                      | 4                                                | 22                                                               |
| <i>STE4</i>                            | 184                      | 3                                                | 20                                                               |
| <i>STE7</i>                            | 167                      | 3                                                | 18                                                               |
| <i>BMH1</i>                            | 165                      | 3                                                | 18                                                               |
| <i>BMH2</i>                            | 151                      | 3                                                | 16                                                               |
| <i>MIG2</i>                            | 147                      | 3                                                | 16                                                               |
| <i>RRN6</i>                            | 146                      | 3                                                | 16                                                               |
| <i>MRS6</i>                            | 137                      | 2                                                | 15                                                               |
| <i>CIN5</i>                            | 132                      | 2                                                | 14                                                               |
| <i>KAR2</i>                            | 130                      | 2                                                | 14                                                               |
| <i>TTA1</i>                            | 123                      | 2                                                | 13                                                               |
| <i>RSC3</i>                            | 120                      | 2                                                | 13                                                               |
| <i>RG72</i>                            | 113                      | 2                                                | 12                                                               |
| <i>ATR1</i>                            | 104                      | 2                                                | 11                                                               |
| WT                                     | 57                       | 1                                                | 6                                                                |
| <i>RPL12B</i>                          | 57                       | 1                                                | 6                                                                |
| <i>FUR4</i>                            | 49                       | 1                                                | 5                                                                |
| <i>YHR125W</i>                         | 47                       | 1                                                | 5                                                                |
| WT                                     | 30                       | 1                                                | 3                                                                |
| <i>RPL13A</i>                          | 24                       | <0.1                                             | 3                                                                |
| <i>GPY1</i>                            | 21                       | <0.1                                             | 2                                                                |
| <i>YIL060W</i>                         | 15                       | <0.1                                             | 2                                                                |
| <i>ICS3</i>                            | 11                       | <0.1                                             | 1                                                                |
| <i>HSE1</i>                            | 9                        | <0.1                                             | 1                                                                |
| <i>YPL080C</i>                         | 8                        | <0.1                                             | 1                                                                |
| <i>RPL21A</i>                          | 2                        | <0.1                                             | <0.1                                                             |
| <i>RPL30</i>                           | 2                        | <0.1                                             | <0.1                                                             |
| <i>FPR2</i>                            | 2                        | <0.1                                             | <0.1                                                             |
| <i>QCR7</i>                            | 2                        | <0.1                                             | <0.1                                                             |
| <i>RME1</i>                            | 2                        | <0.1                                             | <0.1                                                             |
| <i>MED1</i>                            | 1                        | <0.1                                             | <0.1                                                             |
| <i>YOL085C</i>                         | 1                        | <0.1                                             | <0.1                                                             |
| <i>YHR213W-A</i>                       | 1                        | <0.1                                             | <0.1                                                             |
| <i>GJR2</i>                            | 1                        | <0.1                                             | <0.1                                                             |
| <i>RPL35A</i>                          | 1                        | <0.1                                             | <0.1                                                             |
| <i>PMT1</i>                            | 1                        | <0.1                                             | <0.1                                                             |
| <i>YIL028W</i>                         | <0.1                     | <0.1                                             | <0.1                                                             |
| <i>PHO11</i>                           | <0.1                     | <0.1                                             | <0.1                                                             |
| <i>SUE1</i>                            | <0.1                     | <0.1                                             | <0.1                                                             |
| <i>QR11</i>                            | <0.1                     | <0.1                                             | <0.1                                                             |
| <i>KRE5</i>                            | <0.1                     | <0.1                                             | <0.1                                                             |
| <i>PNP1</i>                            | <0.1                     | <0.1                                             | <0.1                                                             |
| <i>TUM1</i>                            | <0.1                     | <0.1                                             | <0.1                                                             |
| <i>PHO12</i>                           | <0.1                     | <0.1                                             | <0.1                                                             |
| <i>CDC1</i>                            | <0.1                     | <0.1                                             | <0.1                                                             |
| <i>PSR1</i>                            | <0.1                     | <0.1                                             | <0.1                                                             |

| Screen Validation in <i>msb2Δ</i> <sup>[a]</sup> |                          | Normalized Growth Intensity in <i>msb2Δ</i> <sup>[c]</sup> |
|--------------------------------------------------|--------------------------|------------------------------------------------------------|
| Gene                                             | Intensity <sup>[b]</sup> |                                                            |
| <i>HIS3</i>                                      | 199                      | 22                                                         |
| <i>STE4</i>                                      | 181                      | 20                                                         |
| <i>STE7</i>                                      | 117                      | 13                                                         |
| <i>BMH1</i>                                      | 77                       | 9                                                          |
| <i>BMH2</i>                                      | 16                       | 2                                                          |
| <i>MIG2</i>                                      | 56                       | 6                                                          |
| <i>RRN6</i>                                      | 22                       | 2                                                          |
| <i>MRS6</i>                                      | 14                       | 2                                                          |
| <i>CIN5</i>                                      | 16                       | 2                                                          |
| <i>KAR2</i>                                      | 33                       | 4                                                          |
| <i>TTA1</i>                                      | <0.1                     | <0.1                                                       |
| <i>RSC3</i>                                      | <0.1                     | <0.1                                                       |
| <i>RG72</i>                                      | <0.1                     | <0.1                                                       |
| <i>ATR1</i>                                      | <0.1                     | <0.1                                                       |
| WT                                               | 9                        | 1                                                          |
| <i>RPL12B</i>                                    | <0.1                     | <0.1                                                       |
| <i>FUR4</i>                                      | <0.1                     | <0.1                                                       |
| <i>YHR125W</i>                                   | <0.1                     | <0.1                                                       |
| WT                                               | <0.1                     | <0.1                                                       |
| <i>RPL13A</i>                                    | <0.1                     | <0.1                                                       |
| <i>GPY1</i>                                      | <0.1                     | <0.1                                                       |
| <i>YIL060W</i>                                   | <0.1                     | <0.1                                                       |
| <i>ICS3</i>                                      | <0.1                     | <0.1                                                       |
| <i>HSE1</i>                                      | <0.1                     | <0.1                                                       |
| <i>YPL080C</i>                                   | <0.1                     | <0.1                                                       |
| <i>RPL21A</i>                                    | <0.1                     | <0.1                                                       |
| <i>RPL30</i>                                     | <0.1                     | <0.1                                                       |
| <i>FPR2</i>                                      | <0.1                     | <0.1                                                       |
| <i>QCR7</i>                                      | <0.1                     | <0.1                                                       |
| <i>RME1</i>                                      | <0.1                     | <0.1                                                       |
| <i>MED1</i>                                      | <0.1                     | <0.1                                                       |
| <i>YOL085C</i>                                   | <0.1                     | <0.1                                                       |
| <i>YHR213W-A</i>                                 | 17                       | 2                                                          |
| <i>GJR2</i>                                      | <0.1                     | <0.1                                                       |
| <i>RPL35A</i>                                    | 27                       | 3                                                          |
| <i>PMT1</i>                                      | <0.1                     | <0.1                                                       |
| <i>YIL028W</i>                                   | <0.1                     | <0.1                                                       |
| <i>PHO11</i>                                     | <0.1                     | <0.1                                                       |
| <i>SUE1</i>                                      | 1                        | <0.1                                                       |
| <i>QR11</i>                                      | <0.1                     | <0.1                                                       |
| <i>KRE5</i>                                      | 3                        | <0.1                                                       |
| <i>PNP1</i>                                      | <0.1                     | <0.1                                                       |
| <i>TUM1</i>                                      | <0.1                     | <0.1                                                       |
| <i>PHO12</i>                                     | <0.1                     | <0.1                                                       |
| <i>CDC1</i>                                      | <0.1                     | <0.1                                                       |
| <i>PSR1</i>                                      | <0.1                     | <0.1                                                       |

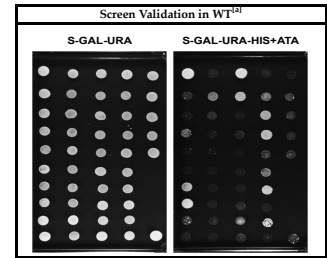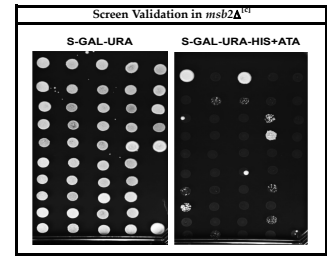

| Validation Key   |                |                |                |                |
|------------------|----------------|----------------|----------------|----------------|
| <i>HIS3</i>      | <i>PMT1</i>    | <i>STE4</i>    | <i>YOL085C</i> | <i>QR11</i>    |
| <i>ICS3</i>      | <i>CIN5</i>    | <i>BMH2</i>    | <i>RSC3</i>    | <i>YHR125W</i> |
| <i>YHR213W-A</i> | <i>HSE1</i>    | <i>YIL028W</i> | <i>MIG2</i>    | <i>GPY1</i>    |
| <i>ATR1</i>      | <i>GJR2</i>    | <i>RPL30</i>   | <i>STE7</i>    | <i>RPL21A</i>  |
| <i>RME1</i>      | <i>QCR7</i>    | <i>RPL35A</i>  | <i>FUR4</i>    | WT             |
| <i>TUM1</i>      | <i>PHO12</i>   | <i>RPL35A</i>  | <i>TTA1</i>    | blank          |
| <i>MRS6</i>      | <i>PHO11</i>   | <i>CDC1</i>    | <i>RRN6</i>    | blank          |
| <i>BMH1</i>      | <i>PSR1</i>    | <i>YIL060W</i> | <i>MED1</i>    | blank          |
| <i>RPL12B</i>    | <i>YPL080C</i> | <i>RG72</i>    | <i>KAR2</i>    | blank          |
| <i>SUE1</i>      | <i>KRES</i>    | <i>RPL13A</i>  | <i>FPR2</i>    | WT             |

<sup>[a]</sup>The plasmids were transformed to PC6021 background.

<sup>[b]</sup>Colonies growth intensity measured in day 3.

<sup>[c]</sup>Values are normalized to WT's value. Wt is set to 1.

<sup>[d]</sup>Growth intensity rates of the candidates validated in wild type is normalized to *msb2Δ* mutant.

<sup>[e]</sup>The plasmids were transformed to PC3209 background.

<sup>[f]</sup>Colonies growth intensity measured in day 6.



Table S4. Raw data of genome-wide screen.

Left plate, S-GAL-URA; middle plate S-GAL-URA-HIS, and right plate S-GAL-URA-HIS-ATA.

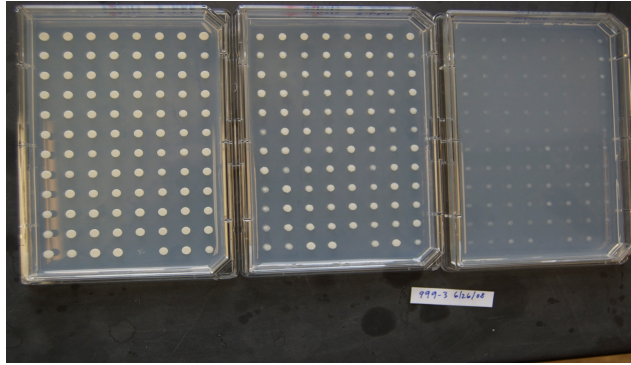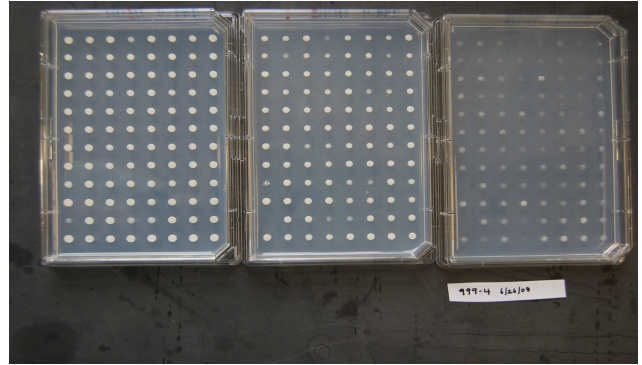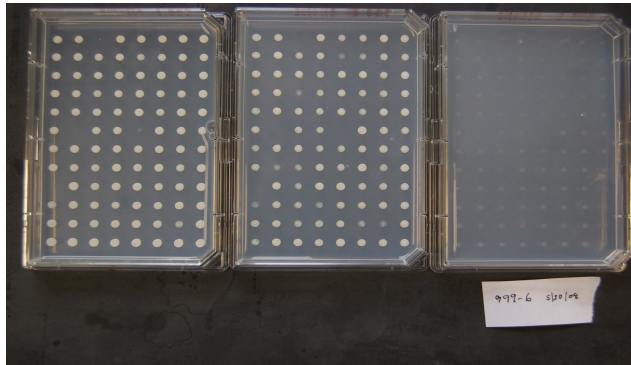

Left plate: S-GAL-URA, middle plate S-GAL-URA-HIS, and right plate S-GAL-URA-HIS-ATA.

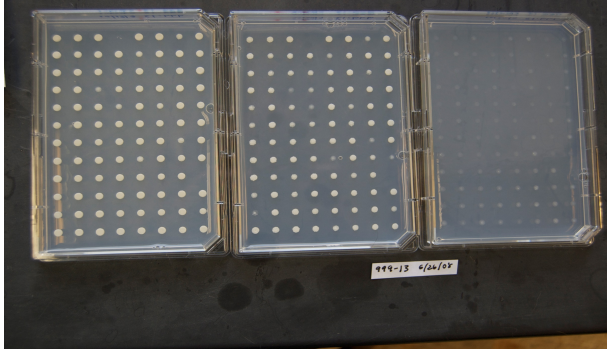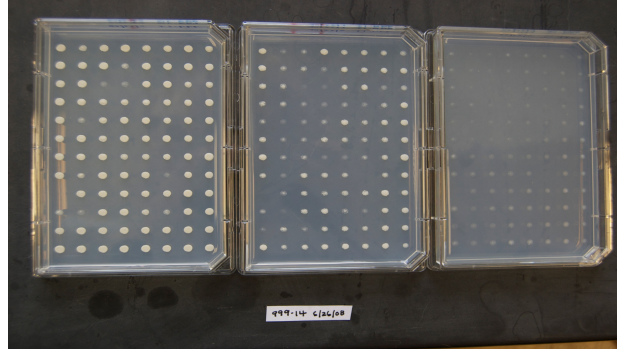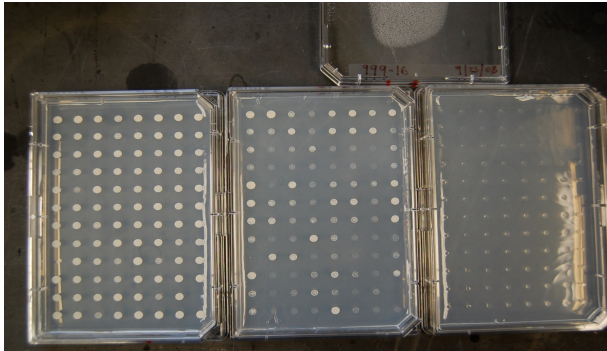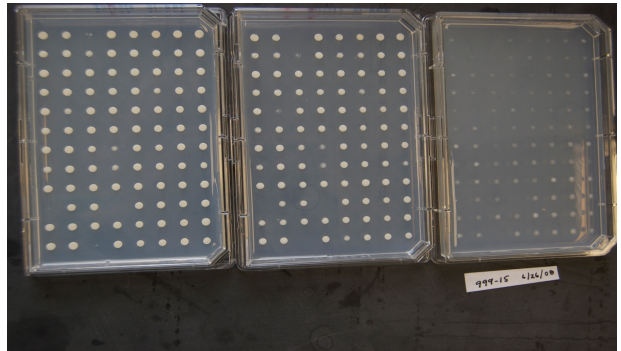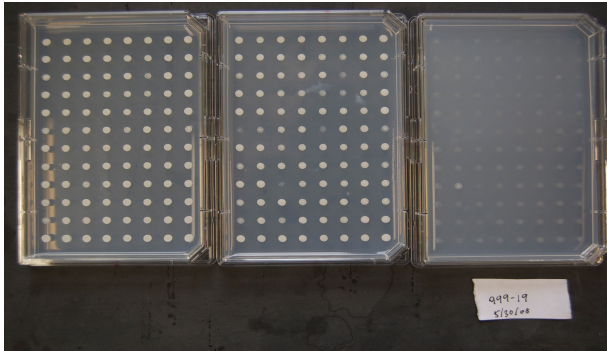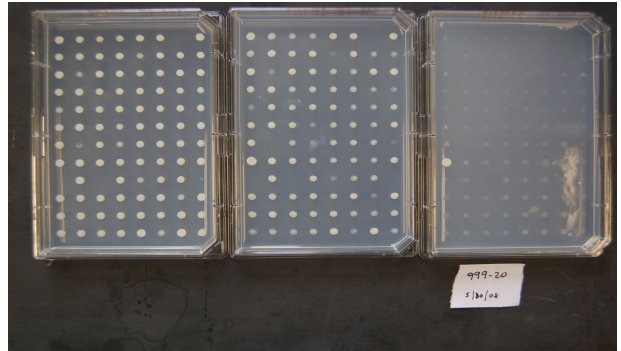



Left plate: S-GAL-URA, middle plate: S-GAL-URA-HIS, and right plate: S-GAL-URA-HIS-ATA.

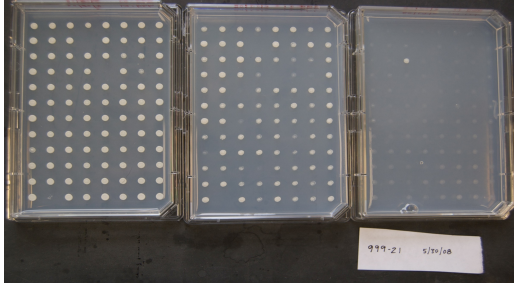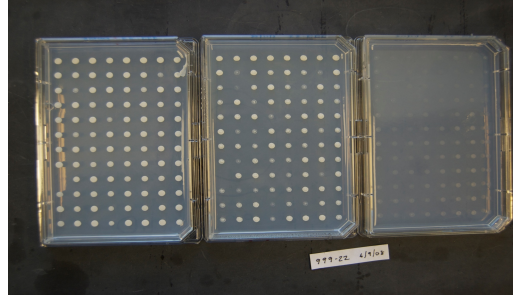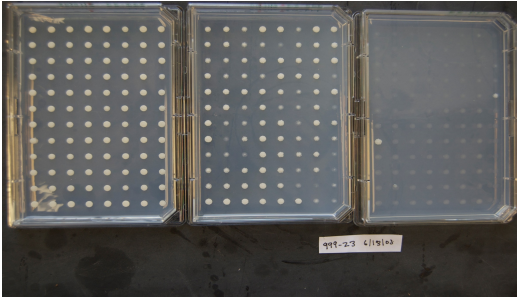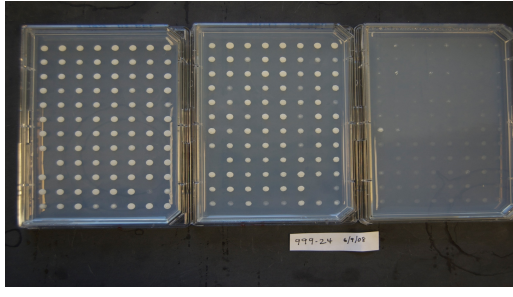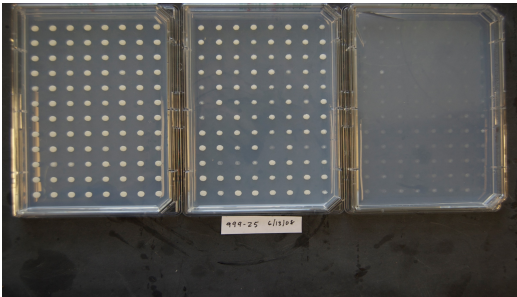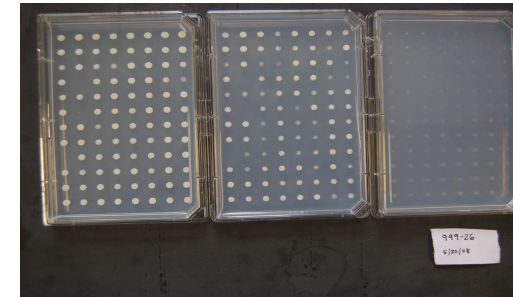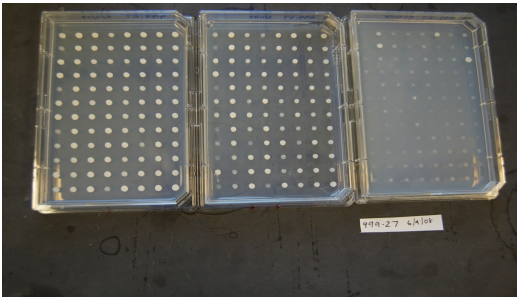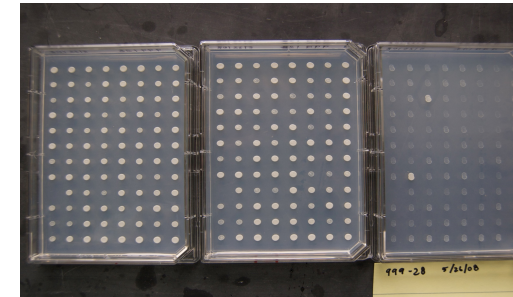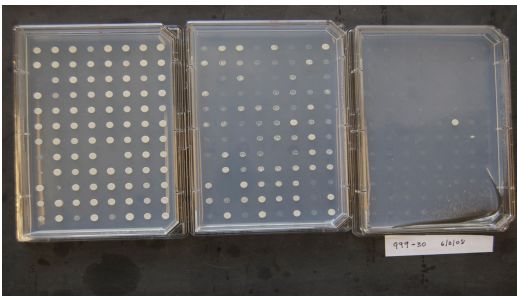

Left plate: S-GAL-URA; middle plate: S-GAL-URA-HIS; and right plate: S-GAL-URA-HIS-ATA.

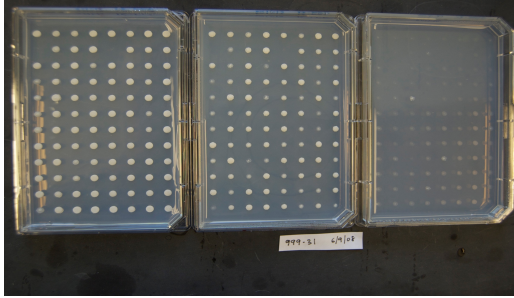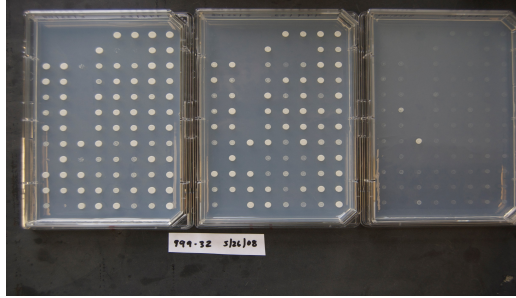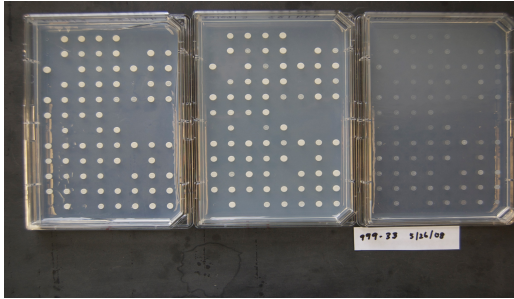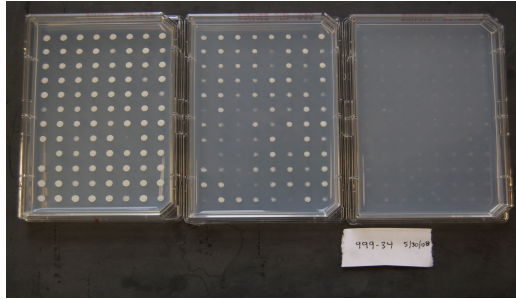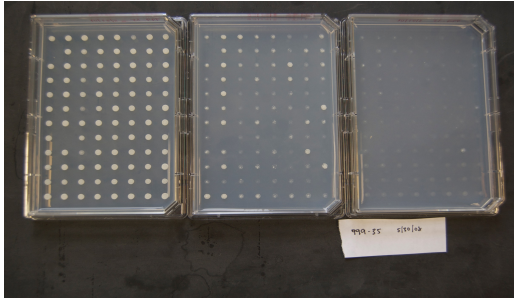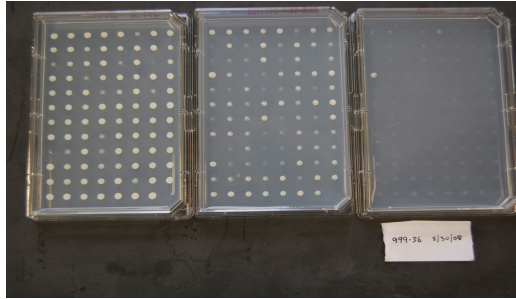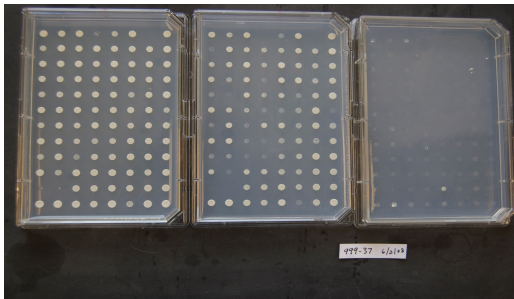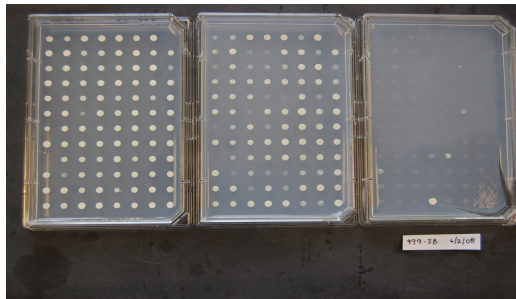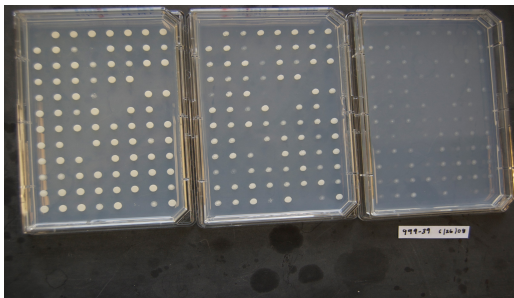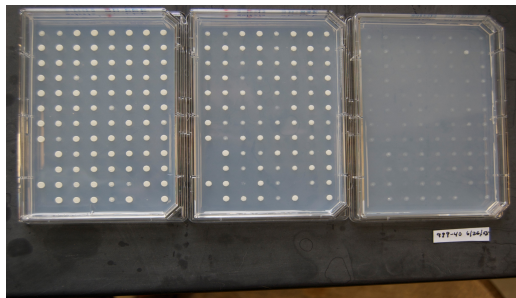



Left plate: S-GAL-URA, middle plate: S-GAL-URA-HIS, and right plate: S-GAL-URA-HIS-ATA.

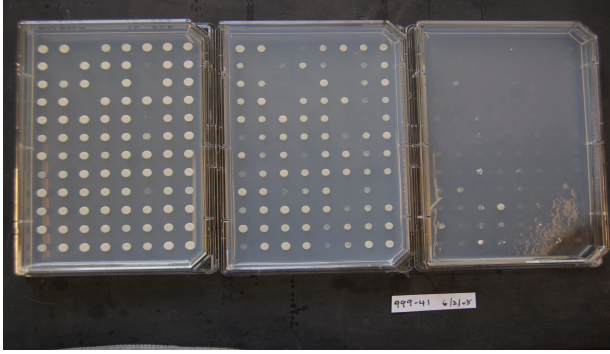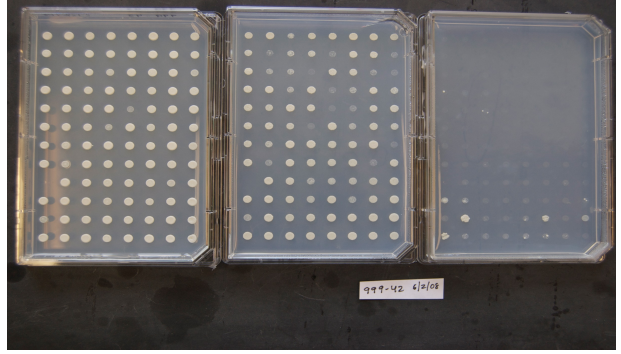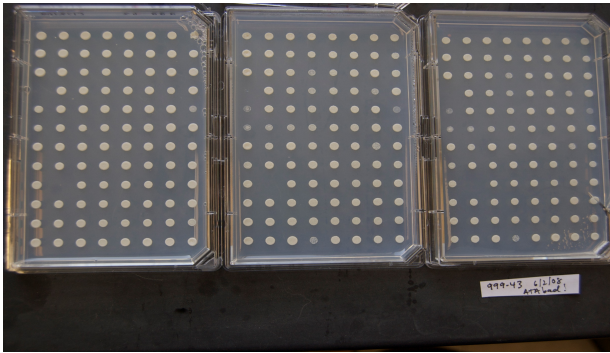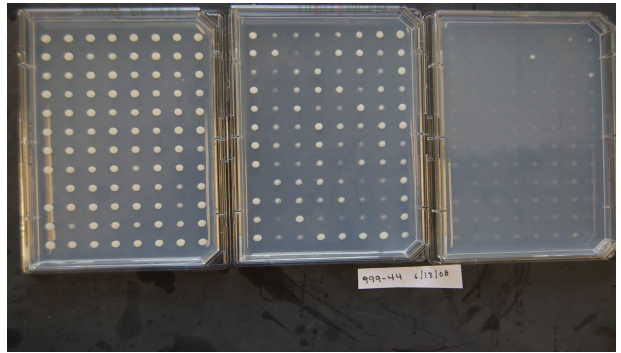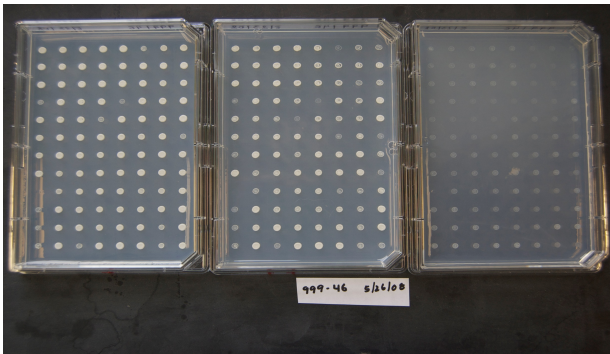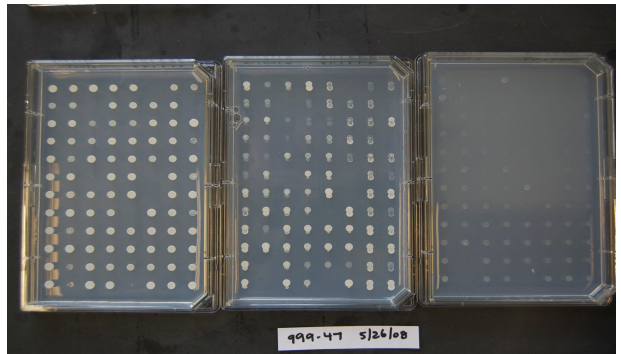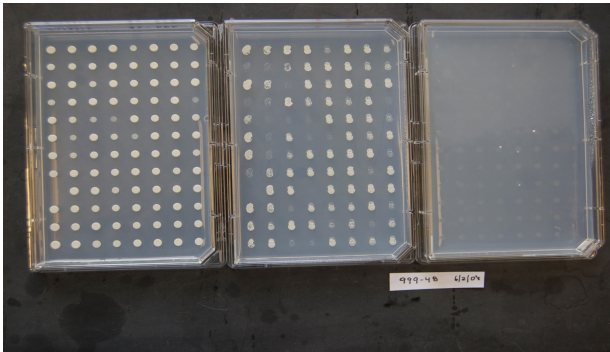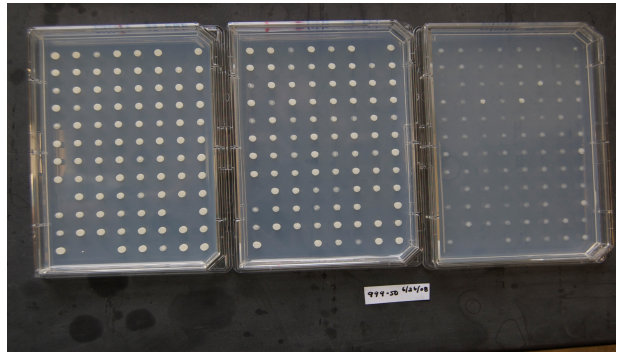

Left plate S-GAL-URA, middle plate S-GAL-URA-HIS, and right plate S-GAL-URA-HIS-ATA.

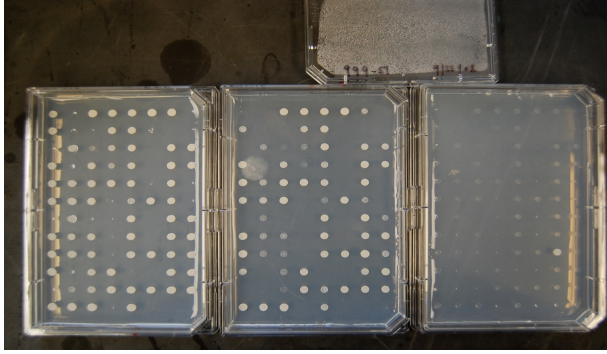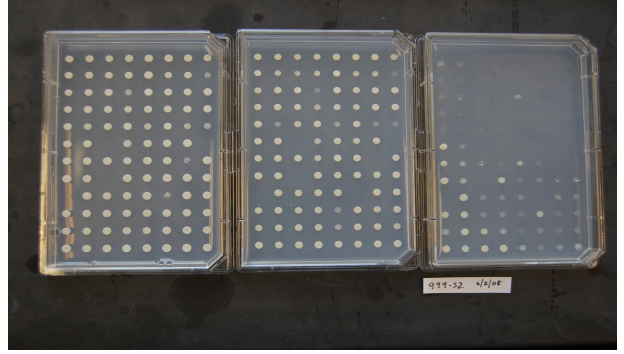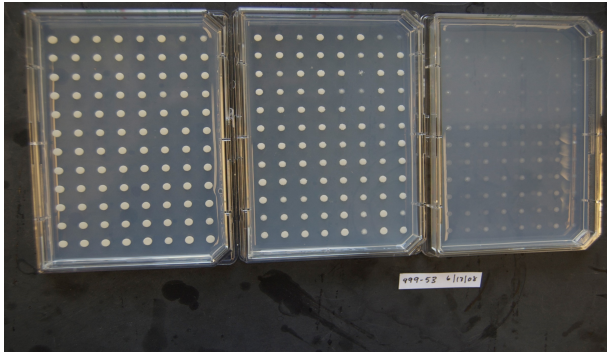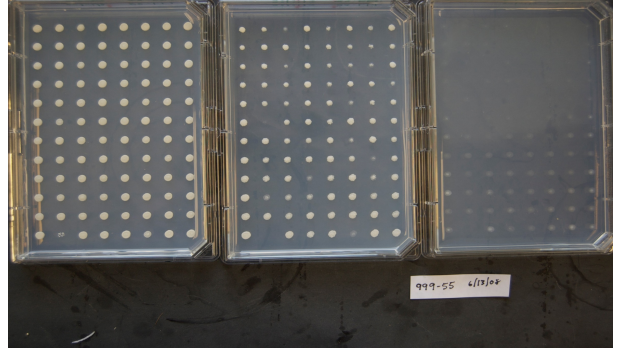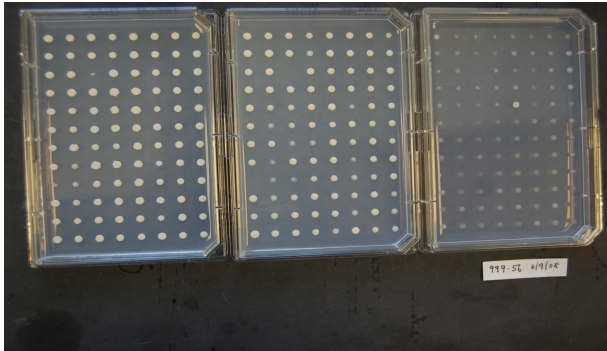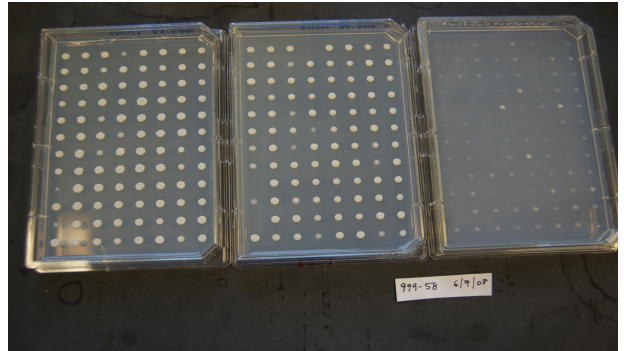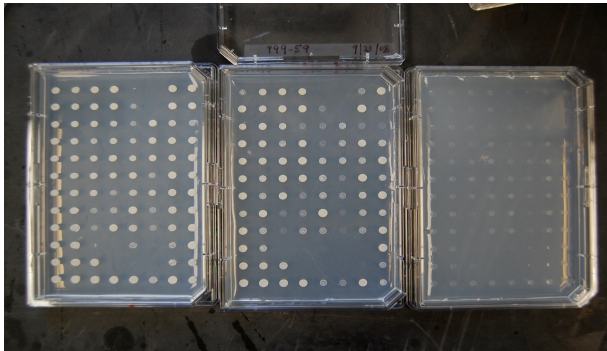



Left plate S-GAL-URA; middle plate S-GAL-URA-HIS; and right plate S-GAL-URA-HIS+ATA

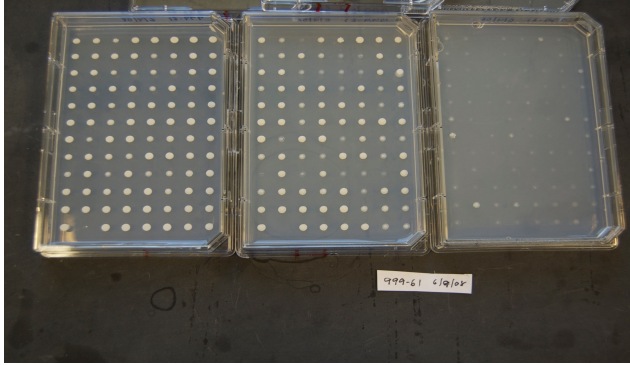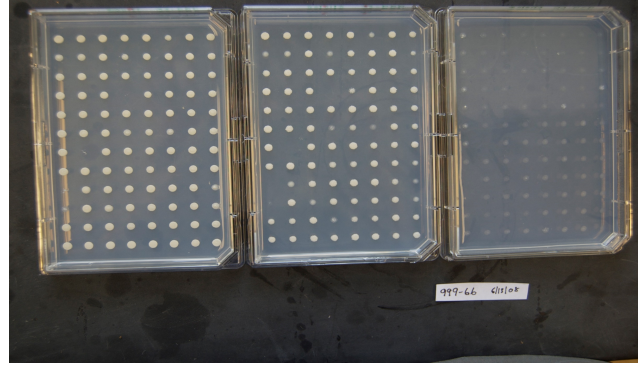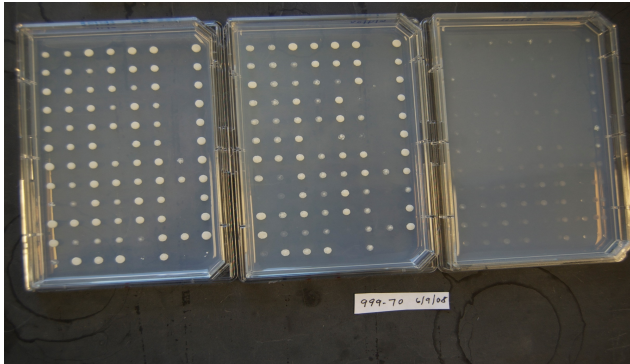

Supplement: 41598_2020_78470_MOESM1_ESM.pdf [file 41598_2020_78470_MOESM1_ESM.pdf]
